# Supplementary material for: Improvement in photodynamic activity by a porphyrin–fullerene composite system in lipid membranes
Source: Royal Society of Chemistry journal article supplement (doi:10.1039/d3ob00027c), 2023-01-01
Supplement: d3ob00027c1.pdf [file d3ob00027c1.pdf]

## Supporting Information

### **Improvement in photodynamic activity by porphyrin–fullerene composite system in lipid membrane**

Kotaro Nishimura, Keita Yamana, Riku Kawasaki and Atsushi Ikeda \*

Applied Chemistry Program, Graduate School of Advanced Science and Engineering, Hiroshima University, 1-4-1 Kagamiyama, Higashi-Hiroshima 739-8527, Japan

**Scheme S1.** Energy or electron transfer mechanism from photoactivated **1** to C<sub>60</sub>-**2**. If the triplet excited state of C<sub>60</sub>-**2** (<sup>3</sup>C<sub>60</sub>-**2**<sup>\*</sup>) is generated via energy transfer from photoactivated **1** to C<sub>60</sub>-**2**, either O<sub>2</sub><sup>•-</sup> or <sup>1</sup>O<sub>2</sub> can be produced by a Type I or Type II reaction between C<sub>60</sub>-**2** and dissolved oxygen. Conversely, if the radical anion of C<sub>60</sub>-**2** (C<sub>60</sub>-**2**<sup>•-</sup>) is generated via electron transfer from photoactivated **1** to C<sub>60</sub>-**2**, only O<sub>2</sub><sup>•-</sup> can be produced by a Type I reaction between C<sub>60</sub>-**2**<sup>•-</sup> and dissolved oxygen.

Energy transfer from porphyrin **1** to C<sub>60</sub>-**2**

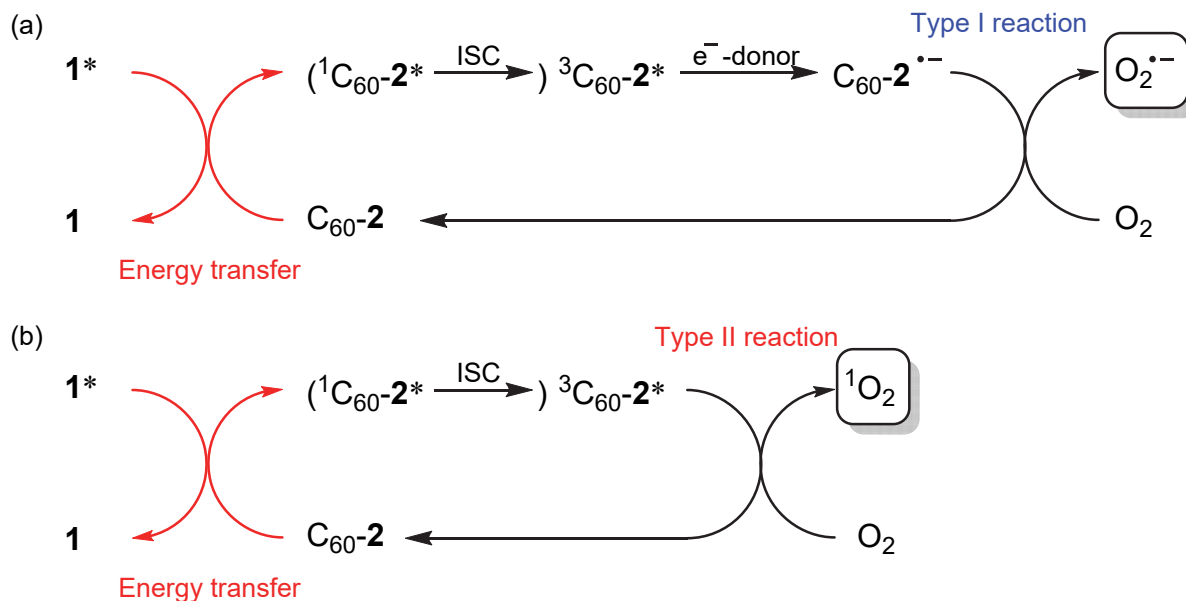

Electron transfer from porphyrin **1** to C<sub>60</sub>-**2**

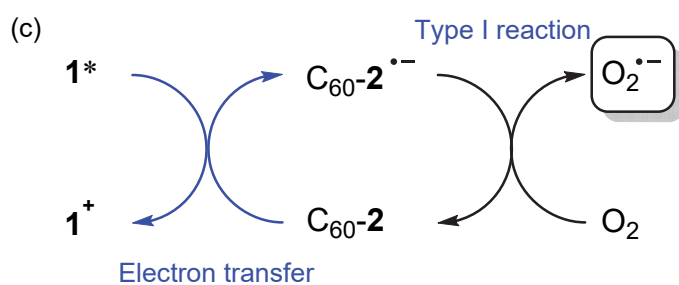

**Scheme S2.** Generation O<sub>2</sub><sup>•-</sup> and then OH<sup>•</sup> from dissolved oxygen by photosensitizer<sup>23</sup>

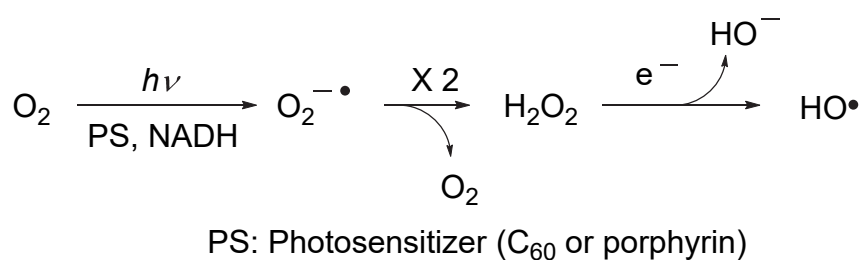

**Scheme S3.** Representation of the exchange method implemented for the preparation of LMI1–C<sub>60</sub>-2 ( $\gamma$ -CDx =  $\gamma$ -cyclodextrin; LMI = lipid membrane–incorporated).

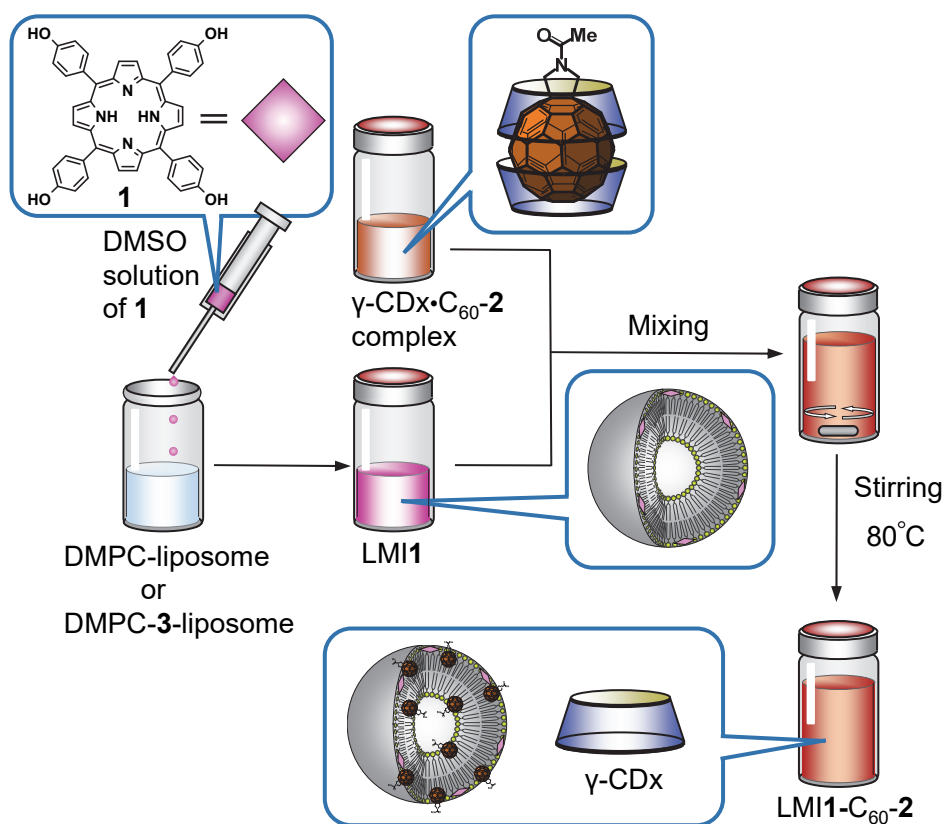

**Scheme S4.** Conversion of 9,10-anthracenediyl-bis(methylene)dimalonic acid to the corresponding endoperoxide as a result of reaction with singlet oxygen (<sup>1</sup>O<sub>2</sub>).

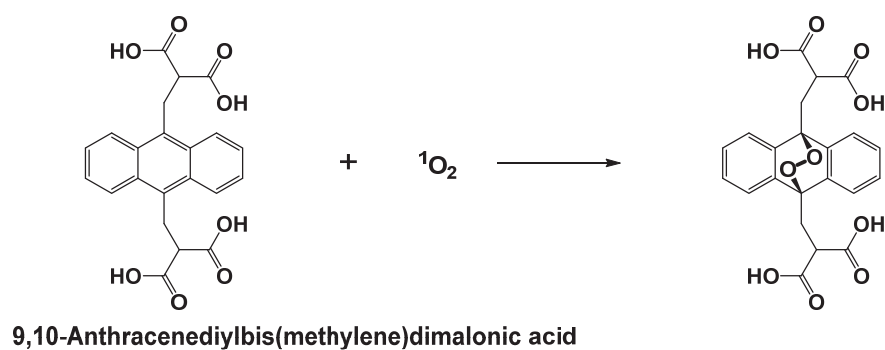

**Scheme S5.** Conversion of nitroblue tetrazolium to formazan as a result of reaction with superoxygen ( $O_2^{\cdot-}$ ).

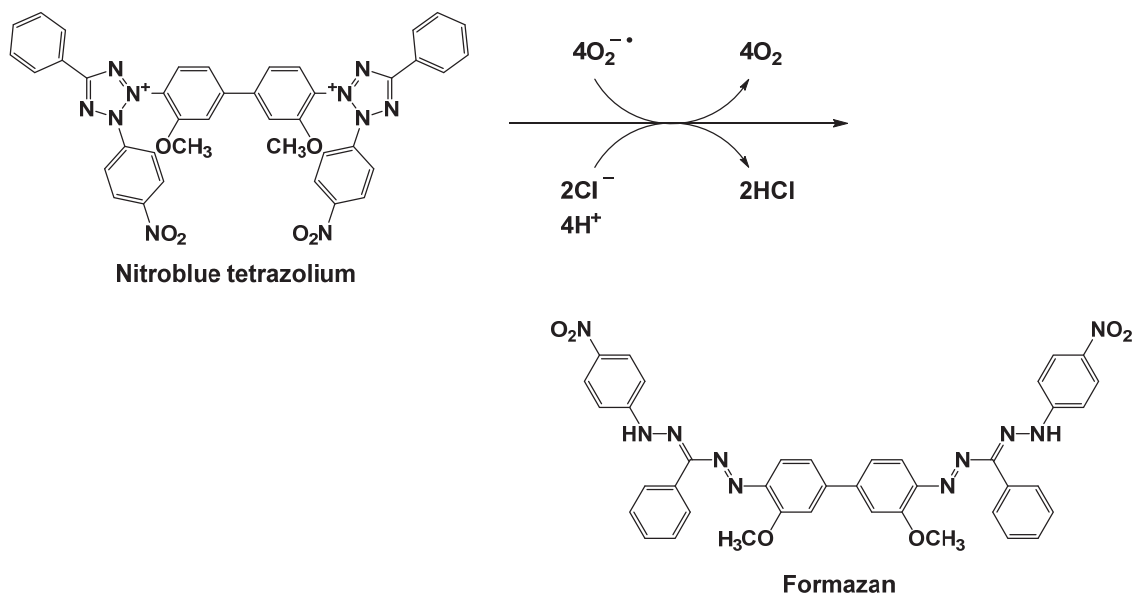

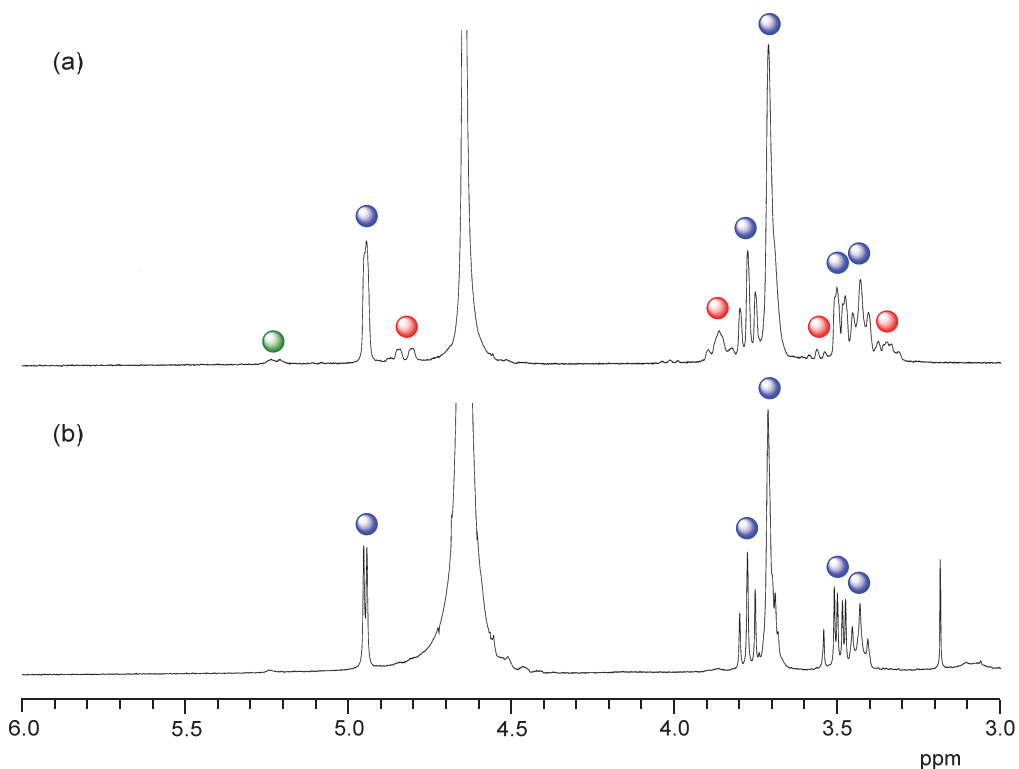

**Fig. S1** Sections of the  $^1\text{H}$  NMR spectra of the  $\gamma$ -cyclodextrin- $\text{C}_{60}\text{-2}$  complex (a) before and (b) after the addition of the DMPC liposomes in  $\text{D}_2\text{O}$ . The blue circles indicate peaks due to free  $\gamma$ -cyclodextrin; the red circles indicate peaks due to  $\gamma$ -cyclodextrin in the  $\gamma$ -cyclodextrin- $\text{C}_{60}\text{-2}$  complex; the green circle indicates the peak due to  $\text{C}_{60}\text{-2}$  in the  $\gamma$ -cyclodextrin- $\text{C}_{60}\text{-2}$  complex. (a)  $[\text{C}_{60}\text{-2}] = 0.05 \text{ mM}$ ;  $[\gamma\text{-cyclodextrin}] = 0.7 \text{ mM}$ ; (b)  $[\text{DMPC}] = 1.0 \text{ mM}$ ;  $[\text{C}_{60}\text{-2}]/[\text{DMPC}] = 5.0 \text{ mol\%}$ ;  $[\text{DiD}]/[\text{DMPC}] = 2.5 \text{ mol\%}$ .

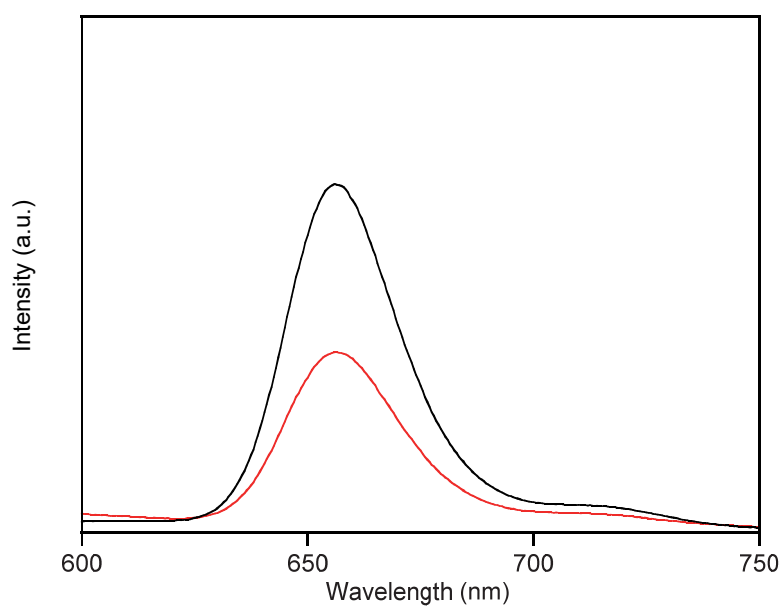

**Fig. S2** Fluorescence spectra ( $\lambda_{\text{ex}}$ : 570 nm) of LMI1 (black line) and LMI1- $\text{C}_{60}\text{-2}$  (red line) ( $[\text{DMPC}] = 0.1 \text{ mM}$ ;  $[\text{1}]/[\text{DMPC}] = 2.5 \text{ mol\%}$ ;  $[\text{C}_{60}\text{-2}]/[\text{DMPC}] = 5.0 \text{ mol\%}$ ) in water.

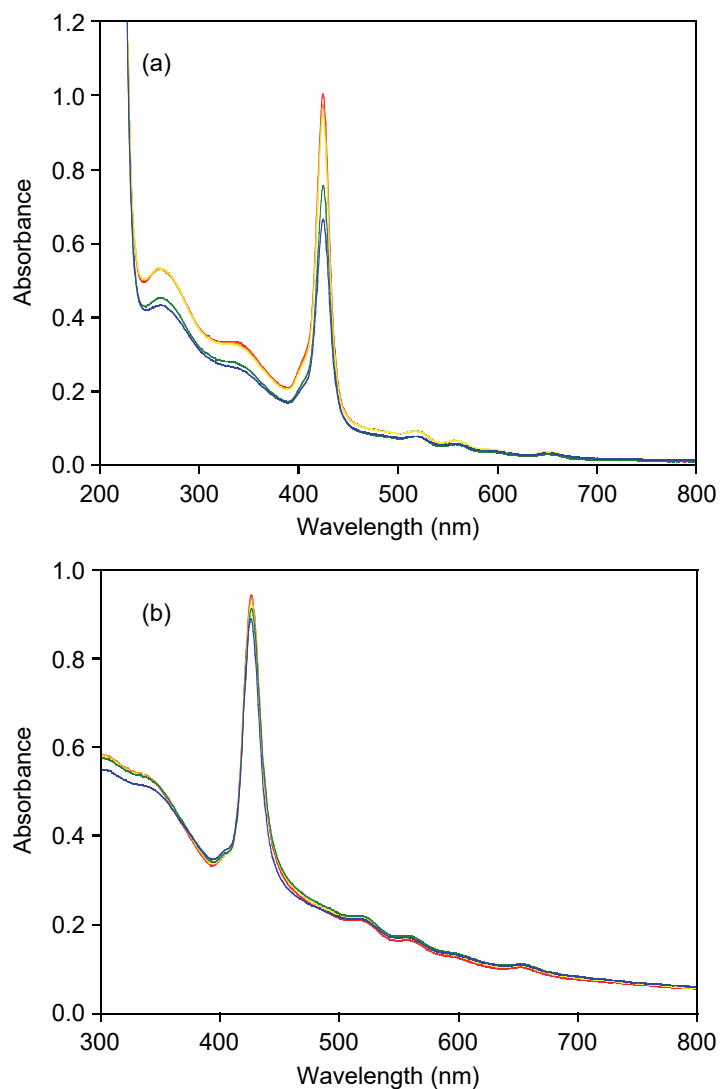

**Fig. S3** UV-Vis absorption spectra of LMI1-C<sub>60</sub>-2 (a) in water after incubation times of 0 (red), 1 (orange), 3 (yellow), 5 (green), and 7 (blue) days and (b) in blood serum after incubation times of 0 (red), 2 (orange), 4 (yellow), 6 (green), and 24 (blue) hours at 37 °C using a 1-cm cell ([DMPC] = 0.1 mM; [1] = 2.5 μM; [C<sub>60</sub>-2] = 5.0 μM).

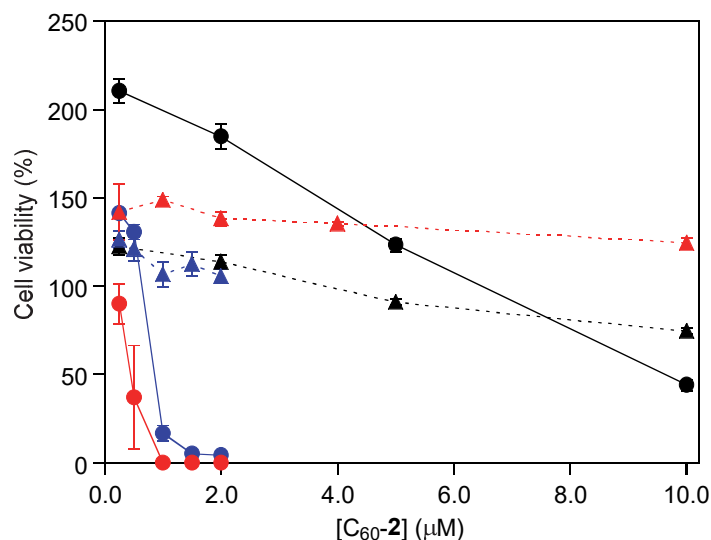

**Fig. S4** Cell viability of Colon26 cells treated with LMIC<sub>60-2</sub> (black), LMI1-C<sub>60-2</sub> (red), and LMI1+LMIC<sub>60-2</sub> mixture (blue) in the dark (triangles and dashed lines) and after photoirradiation at 610–740 nm for 30 min (circles and solid lines) at concentrations of C<sub>60-2</sub> ranging from 0.25 to 10.0 μM. The cell viability was evaluated 24 h after treatment using the WST-8 method. The error bars represent the mean ± standard deviation for  $n = 3$ .

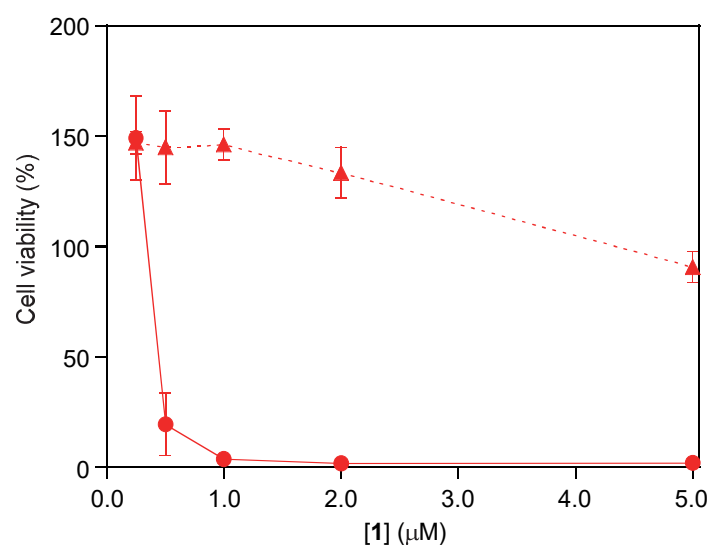

**Fig. S5** Cell viability of L929 cells treated with LMI1-C<sub>60-2</sub> in the dark (triangles and dashed lines) and after photoirradiation at 610–740 nm for 30 min (circles and solid lines) at concentrations of C<sub>60-2</sub> ranging from 0.25 to 5.0 μM. The cell viability was evaluated 24 h after treatment using the WST-8 method. The error bars represent the mean ± standard deviation for  $n = 3$ .

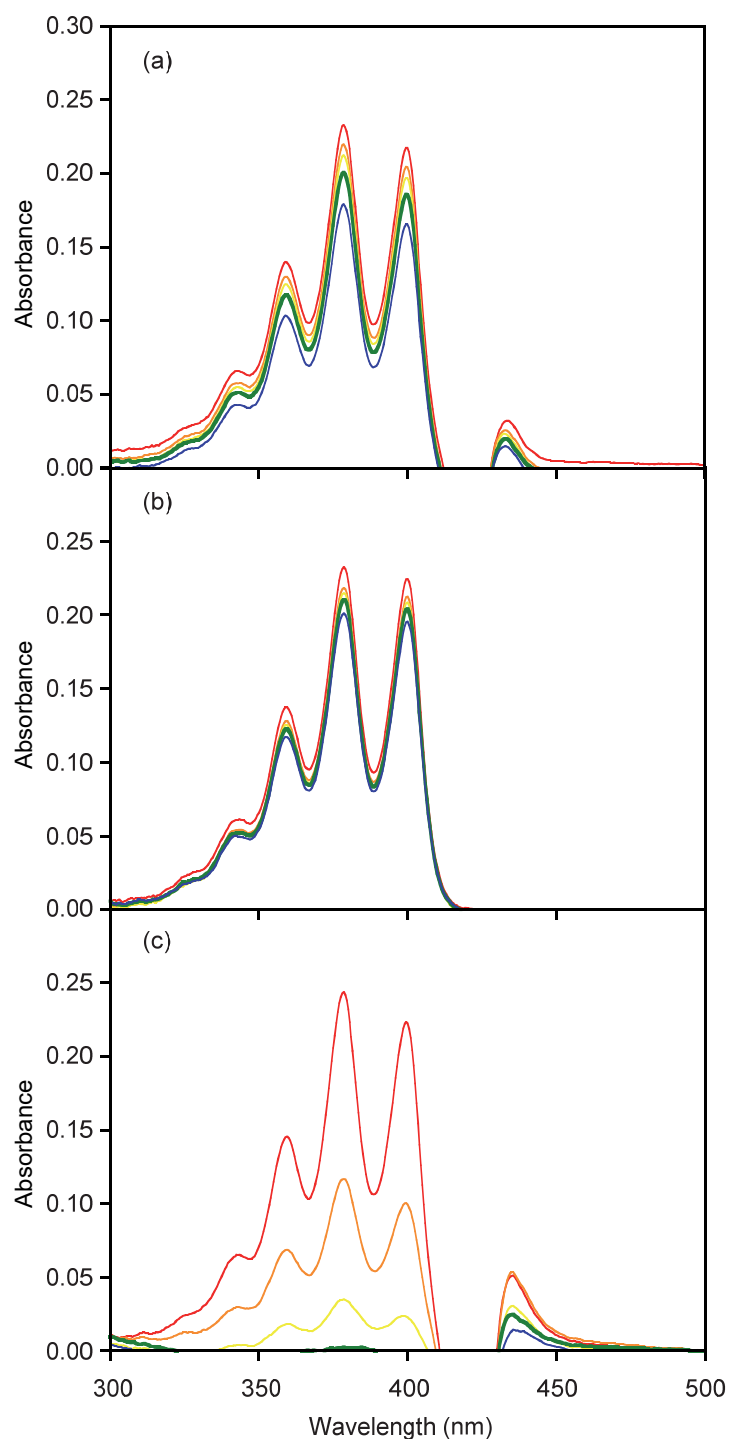

**Fig. S6** Time-dependent bleaching of 9,10-anthracenediyl-bis(methylene)dimalonic acid (ABDA) caused by the generation of singlet oxygen by (a) LMI1, (b) LMIC<sub>60-2</sub>, and (c) LMI1-C<sub>60-2</sub>, upon photoirradiation ( $\lambda > 620$  nm,  $15 \text{ mW cm}^{-2}$ ) for 0 (red line), 7.5 (orange line), 15 (yellow line), 30 (green line), and 60 (blue line) min. A dimethyl sulfoxide solution of ABDA was injected into aqueous solutions of the liposomes. The absorption spectra were obtained by subtracting the absorption of LMI1, LMIC<sub>60-2</sub>, and LMI1-C<sub>60-2</sub>, respectively. [DMPC] = 0.1 mM, [1] = 0 or 2.5  $\mu\text{M}$ , [C<sub>60-2</sub>] = 0 or 5.0  $\mu\text{M}$ , and [ABDA] = 25  $\mu\text{M}$ ; 1-cm cell. The experiments were conducted under an oxygen atmosphere at 25 °C.



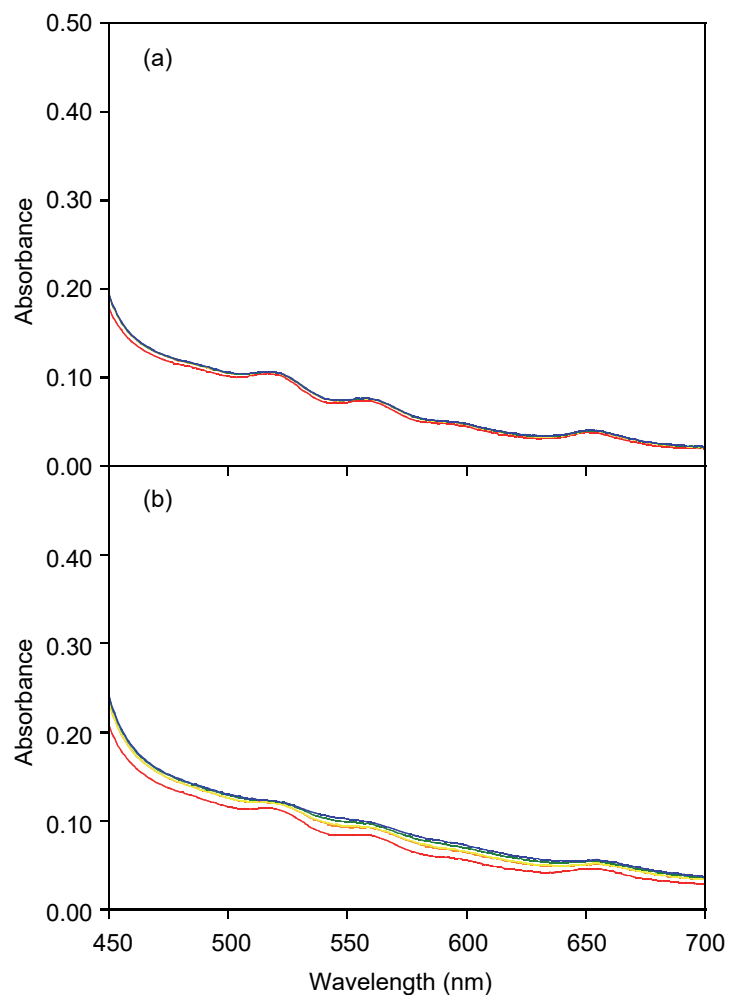

**Fig. S7** Changes in the UV–Vis absorption of formazan generated by the reduction of NBT in the presence of LMI1–C<sub>60</sub>-2 in (a) the absence and (b) the presence of NADH, after photoirradiation at a wavelength greater than 620 nm for 0 (red line), 7.5 (orange line), 15 (yellow line), 30 (green line), and 60 (blue line) min. [DMPC] = 0.1 mM, [1] = 0 or 2.5  $\mu$ M, [C<sub>60</sub>-2] = 0 or 5.0  $\mu$ M, [NBT] = 0.20 mM, and [NADH] = 0 or 0.50 mM; 1-cm cell. The experiments were conducted under an oxygen atmosphere at 25 °C.

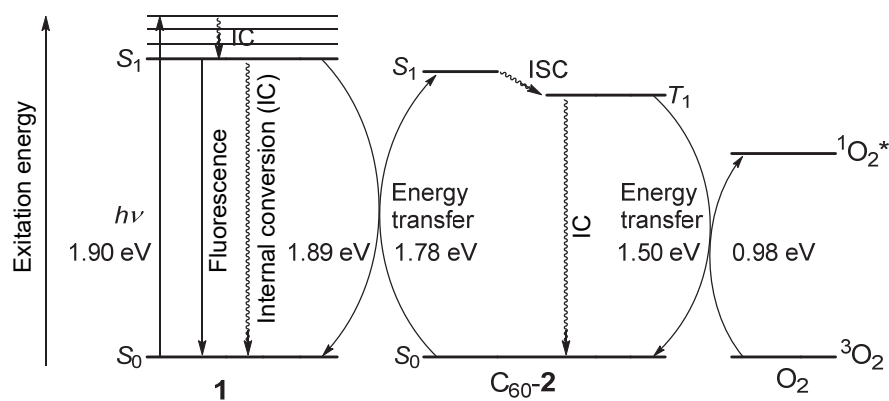

**Fig. S8** Schematic illustrations of Jablonski diagrams in LMI1-C<sub>60</sub>-2 (The energy potential (S<sub>0</sub> → S<sub>1</sub>) of C<sub>60</sub>-2 was determined using the wavelength of maximum fluorescent emission of γ-cyclodextrin-C<sub>60</sub>-2 complex.<sup>28</sup> The energy potential (T<sub>1</sub> → S<sub>0</sub>) of C<sub>60</sub>-2 was determined from wavelength of maximum phosphorescence emission of *N*-methyl fulleropyrrolidine in methylcyclohexane, which was reported in Ref. S1 and S2, because the phosphorescence of C<sub>60</sub>-2 has not reported.).

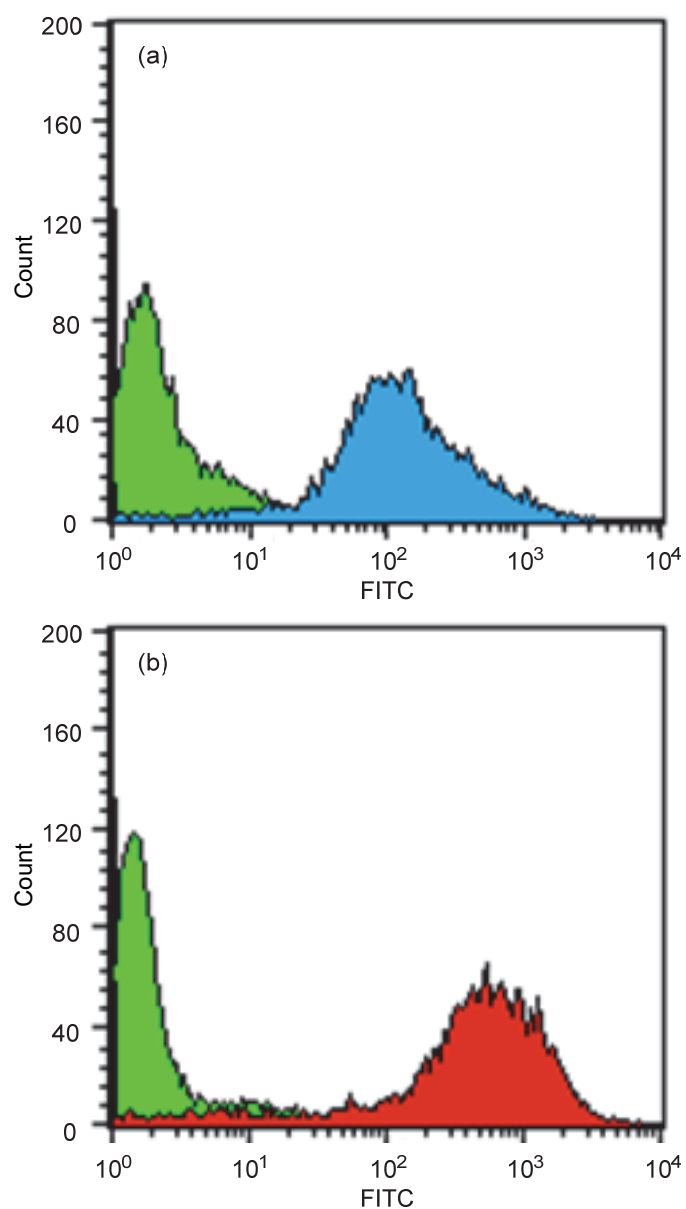

**Fig. S9** Flow cytometry analysis for the detection of LMI1–C<sub>60</sub>-2 in (a) Colon26 (blue) and (b) HeLa (red) cells treated with LMI1–C<sub>60</sub>-2 ([DMPC] = 0.04 mM, [1] = 1.0 μM, [C<sub>60</sub>-2] = 2.0 μM) and control (green; [DMPC] = [1] = [C<sub>60</sub>-2] = 0 mM).

#### References

- S1 R. M. Williams, J. M. Zwier and J. W. Verhoeven, *J. Am. Chem. Soc.*, 1995, **117**, 4093–4099.
- S2 C. Luo, M. Fujitsuka, A. Watanabe, O. Ito, L. Gan, Y. Huang and C.-H. Huang, *J. Chem. Soc., Faraday Trans.*, 1998, **94**, 527–532.
